# Supplementary material for: Environmental temperature and growth faltering in African children: a cross-sectional study
Source: PubMed Central journal article supplement (PMC7232952; doi:10.1016/s2542-5196(20)30037-1), 2020-03-25
Supplement: mmc1.pdf [file mmc1.pdf]

# THE LANCET Planetary Health

## Supplementary appendix

This appendix formed part of the original submission and has been peer reviewed.  
We post it as supplied by the authors.

Supplement to: Tusting L S, Bradley J, Bhatt S, et al. Environmental temperature and growth faltering in African children: a cross-sectional study. *Lancet Planet Health* 2020; **4**: e116–23.

## Supplementary Information

Table S1. Characteristics of surveys (n=52) included in the adjusted analysis

| Survey                 | Household-level characteristics |                                                 |                     |                             |                                    |                         | Child-level characteristics |                       |          |                 |                |                     |                            |                                  |                            |                                |                                          |
|------------------------|---------------------------------|-------------------------------------------------|---------------------|-----------------------------|------------------------------------|-------------------------|-----------------------------|-----------------------|----------|-----------------|----------------|---------------------|----------------------------|----------------------------------|----------------------------|--------------------------------|------------------------------------------|
|                        | N                               | Household head attended secondary education (%) | Urban residence (%) | Finished floor material (%) | Improved drinking water source (%) | Improved sanitation (%) | N                           | Mean age in years (%) | Male (%) | Stunted (% , N) | Wasted (% , N) | Underweight (% , N) | Stunted and wasted (% , N) | Slept under ITN night before (%) | Received DPT-3 vaccine (%) | Received measles-1 vaccine (%) | Reported diarrhoea in past two weeks (%) |
| Angola 2015 DHS        | 16109                           | 37.1                                            | 55.1                | 39.0                        | 50.4                               | 56.1                    | 18311                       | 2.5                   | 49.6     | 31.6 (7453)     | 4.5 (7587)     | 23.0 (7453)         | 1.6 (7453)                 | 21.1                             | 30.1                       | 39.5                           | 14.2                                     |
| Benin 2012 DHS         | 17422                           | 20.4                                            | 40.8                | 58.9                        | 77.2                               | 29.1                    | 17489                       | 2.6                   | 51.0     | 41.6 (8423)     | 14.7 (10486)   | 27.2 (8423)         | 3.0 (8423)                 | 69.8                             | 59.1                       | 60.6                           | 6.6                                      |
| Burkina Faso 2010 DHS  | 14424                           | 10.9                                            | 30.6                | 47.5                        | 79.0                               | 32.9                    | 16969                       | 2.4                   | 50.9     | 29.5 (6878)     | 13.3 (6891)    | 29.6 (6878)         | 3.7 (6878)                 | 48.5                             | 79.2                       | 71.6                           | 15.1                                     |
| Burundi 2010 DHS       | 8596                            | 11.7                                            | 19.5                | 17.1                        | 76.1                               | 44.3                    | 9025                        | 2.4                   | 50.3     | 48.5 (3624)     | 5.2 (3634)     | 32.6 (3624)         | 2.5 (3624)                 | 46.3                             | 88.1                       | 80.3                           | 25.0                                     |
| Burundi 2016 DHS       | 15977                           | 13.1                                            | 18.8                | 19.5                        | 83.0                               | 54.8                    | 15544                       | 2.5                   | 50.3     | 47.5 (6355)     | 4.0 (6358)     | 34.9 (6355)         | 2.5 (6355)                 | 38.7                             | 86.2                       | 69.1                           | 21.6                                     |
| Cameroon 2004 DHS      | 10462                           | 35.9                                            | 46.3                | 50.0                        | 32.0                               | 35.3                    | 9612                        | 2.4                   | 50.0     | 31.4 (3728)     | 4.6 (3843)     | 16.4 (3728)         | 1.3 (3728)                 | 1.1                              | 58.3                       | 55.0                           | 16.4                                     |
| Cameroon 2011 DHS      | 14214                           | 39.0                                            | 47.2                | 53.7                        | 68.0                               | 56.5                    | 14276                       | 2.4                   | 49.7     | 27.8 (5923)     | 4.4 (6001)     | 16.9 (5923)         | 1.8 (5923)                 | 13.2                             | 63.9                       | 62.0                           | 20.5                                     |
| Chad 2014 DHS          | 17233                           | 15.7                                            | 22.5                | 8.4                         | 53.9                               | 12.5                    | 22509                       | 2.6                   | 50.5     | 39.0 (10749)    | 12.3 (11057)   | 37.4 (10749)        | 4.8 (10749)                | 20.3                             | 25.1                       | 47.1                           | 19.9                                     |
| Comoros 2012 DHS       | 4482                            | 32.5                                            | 42.2                | 65.9                        | 89.3                               | 38.2                    | 3933                        | 2.4                   | 50.0     | 24.7 (2705)     | 10.1 (2727)    | 18.3 (2705)         | 1.8 (2705)                 | 44.2                             | 61.5                       | 61.9                           | 16.5                                     |
| DRC 2007 DHS           | 8886                            | 50.2                                            | 41.6                | 21.3                        | 47.2                               | 38.5                    | 10227                       | 2.4                   | 49.4     | 39.6 (3630)     | 9.0 (3652)     | 29.1 (3630)         | 2.1 (3630)                 | 12.3                             | 45.2                       | 57.0                           | 16.7                                     |
| DRC 2013 DHS           | 18171                           | 52.8                                            | 29.9                | 14.3                        | 40.3                               | 37.6                    | 22059                       | 2.4                   | 49.6     | 39.1 (8962)     | 6.9 (8979)     | 27.9 (8962)         | 2.1 (8962)                 | 52.3                             | 50.5                       | 59.6                           | 16.8                                     |
| Cote d'Ivoire 2012 DHS | 9686                            | 22.1                                            | 41.4                | 77.2                        | 79.0                               | 45.5                    | 9742                        | 2.5                   | 50.0     | 24.0 (3781)     | 6.3 (3844)     | 19.3 (3781)         | 1.4 (3781)                 | 37.4                             | 56.9                       | 55.4                           | 18.7                                     |
| Gabon 2012 DHS         | 9755                            | 50.2                                            | 54.8                | 68.3                        | 80.4                               | 38.8                    | 7446                        | 2.3                   | 49.9     | 19.9 (4107)     | 3.3 (4142)     | 11.0 (4107)         | 0.7 (4107)                 | 44.2                             | 34.9                       | 61.6                           | 18.6                                     |
| Ghana 2003 DHS         | 6251                            | 47.8                                            | 40.3                | 84.1                        | 66.0                               | 32.6                    | 4620                        | 2.4                   | 50.3     | 31.0 (3424)     | 7.6 (3451)     | 23.3 (3424)         | 2.1 (3424)                 | 5.0                              | 69.0                       | 68.6                           | 17.0                                     |
| Ghana 2008 DHS         | 11778                           | 55.8                                            | 43.9                | 81.7                        | 77.6                               | 65.4                    | 7411                        | 2.5                   | 50.8     | 23.6 (2665)     | 8.4 (2677)     | 18.3 (2665)         | 1.2 (2665)                 | 39.0                             | 75.7                       | 72.5                           | 20.5                                     |
| Ghana 2014 DHS         | 11835                           | 57.6                                            | 50.2                | 91.5                        | 65.9                               | 68.0                    | 7341                        | 2.4                   | 51.9     | 14.7 (3069)     | 4.8 (3074)     | 14.7 (3069)         | 1.1 (3069)                 | 47.4                             | 78.0                       | 73.9                           | 12.3                                     |
| Guinea 2005 DHS        | 6282                            | 14.1                                            | 27.3                | 42.1                        | 30.0                               | 26.4                    | 7008                        | 2.3                   | 50.8     | 34.4 (2753)     | 9.1 (2895)     | 25.6 (2753)         | 2.9 (2753)                 | 1.3                              | 44.2                       | 46.0                           | 15.2                                     |
| Guinea 2012 DHS        | 7109                            | 19.3                                            | 35.2                | 55.3                        | 73.4                               | 45.0                    | 8531                        | 2.5                   | 51.4     | 26.4 (3525)     | 9.7 (3531)     | 22.0 (3525)         | 2.2 (3525)                 | 27.1                             | 44.4                       | 54.8                           | 17.3                                     |
| Kenya 2008 DHS         | 9057                            | 34.4                                            | 32.1                | 45.0                        | 64.3                               | 50.0                    | 7231                        | 2.4                   | 51.4     | 29.1 (5588)     | 7.1 (5634)     | 20.8 (5588)         | 1.9 (5588)                 | 52.2                             | 72.4                       | 68.8                           | 17.1                                     |
| Kenya 2014 DHS         | 36430                           | 33.5                                            | 38.2                | 43.8                        | 64.5                               | 47.9                    | 26253                       | 2.5                   | 50.6     | 21.5 (20699)    | 5.2 (20793)    | 17.4 (20699)        | 1.4 (20699)                | 52.4                             | 81.5                       | 72.4                           | 15.0                                     |
| Liberia 2013 DHS       | 9333                            | 40.4                                            | 37.0                | 36.4                        | 64.9                               | 33.6                    | 9724                        | 2.5                   | 51.2     | 27.7 (3877)     | 5.9 (3880)     | 20.2 (3877)         | 1.3 (3877)                 | 36.8                             | 55.1                       | 58.0                           | 25.2                                     |
| Madagascar 2008 DHS    | 17857                           | 29.1                                            | 25.2                | 29.8                        | 43.8                               | 7.4                     | 15763                       | 2.5                   | 50.6     | 43.4 (5490)     | -              | -                   | -                          | 46.4                             | 65.3                       | 59.9                           | 8.8                                      |
| Malawi 2010 DHS        | 24825                           | 19.9                                            | 11.7                | 19.9                        | 79.8                               | 11.3                    | 24280                       | 2.5                   | 49.4     | 40.6 (4927)     | 3.7 (4935)     | 17.4 (4927)         | 1.0 (4927)                 | 42.8                             | 85.3                       | 78.8                           | 17.2                                     |
| Malawi 2015 DHS        | 26361                           | 27.6                                            | 18.9                | 28.3                        | 87.0                               | 83.3                    | 21414                       | 2.6                   | 49.9     | 28.6 (5677)     | 2.5 (5719)     | 16.1 (5677)         | 0.8 (5677)                 | 43.8                             | 82.1                       | 68.4                           | 21.1                                     |
| Mali 2006 DHS          | 12998                           | 10.3                                            | 31.8                | 22.6                        | 55.2                               | 21.8                    | 15687                       | 2.4                   | 50.6     | 34.4 (11785)    | 13.6 (11994)   | 31.9 (11785)        | 4.1 (11785)                | 35.3                             | 56.3                       | 56.1                           | 12.0                                     |

| Survey                | Household-level characteristics |                                                 |                     |                             |                                    |                         | Child-level characteristics |                       |          |                 |                |                     |                            |                                  |                            |                                |                                          |
|-----------------------|---------------------------------|-------------------------------------------------|---------------------|-----------------------------|------------------------------------|-------------------------|-----------------------------|-----------------------|----------|-----------------|----------------|---------------------|----------------------------|----------------------------------|----------------------------|--------------------------------|------------------------------------------|
|                       | N                               | Household head attended secondary education (%) | Urban residence (%) | Finished floor material (%) | Improved drinking water source (%) | Improved sanitation (%) | N                           | Mean age in years (%) | Male (%) | Stunted (% , N) | Wasted (% , N) | Underweight (% , N) | Stunted and wasted (% , N) | Slept under ITN night before (%) | Received DPT-3 vaccine (%) | Received measles-1 vaccine (%) | Reported diarrhoea in past two weeks (%) |
| Mali 2012 DHS         | 10107                           | 14.1                                            | 27.4                | 28.3                        | 67.9                               | 43.8                    | 12882                       | 2.5                   | 50.9     | 33.0 (4861)     | 11.6 (4888)    | 30.3 (4861)         | 3.3 (4861)                 | 68.2                             | 55.1                       | 61.1                           | 9.0                                      |
| Mozambique 2011 DHS   | 13919                           | 17.2                                            | 36.6                | 32.5                        | 58.3                               | 22.9                    | 12683                       | 2.4                   | 49.9     | 33.7 (10302)    | 4.2 (10413)    | 17.0 (10302)        | 0.9 (10302)                | 33.1                             | 72.6                       | 71.6                           | 10.7                                     |
| Namibia 2006 DHS      | 9200                            | 44.4                                            | 42.3                | 53.1                        | 88.1                               | 44.0                    | 6774                        | 2.4                   | 49.8     | 24.4 (5156)     | 7.0 (5206)     | 21.9 (5156)         | 2.0 (5156)                 | 10.9                             | 77.1                       | 69.7                           | 13.8                                     |
| Namibia 2013 DHS      | 9849                            | 53.9                                            | 48.4                | 60.2                        | 87.4                               | 47.9                    | 6953                        | 2.5                   | 49.5     | 19.4 (2589)     | 6.7 (2619)     | 17.3 (2589)         | 1.5 (2589)                 | 6.1                              | 77.5                       | 73.5                           | 19.5                                     |
| Nigeria 2008 DHS      | 34070                           | 38.1                                            | 31.5                | 59.8                        | 52.6                               | 49.0                    | 31634                       | 2.4                   | 50.9     | 38.3 (20862)    | 12.8 (20936)   | 28.3 (20862)        | 3.4 (20862)                | 6.1                              | 30.1                       | 36.0                           | 10.8                                     |
| Nigeria 2013 DHS      | 38522                           | 42.7                                            | 41.2                | 65.4                        | 58.3                               | 52.6                    | 35364                       | 2.4                   | 50.7     | 32.3 (26424)    | 14.7 (26463)   | 31.0 (26424)        | 3.8 (26424)                | 18.2                             | 36.7                       | 38.0                           | 10.6                                     |
| Rwanda 2010 DHS       | 12540                           | 11.7                                            | 16.0                | 18.3                        | 74.2                               | 75.0                    | 10697                       | 2.6                   | 50.8     | 36.6 (4380)     | 2.5 (4396)     | 15.3 (4380)         | 0.8 (4380)                 | 67.8                             | 91.2                       | 81.6                           | 13.4                                     |
| Rwanda 2015 DHS       | 12698                           | 13.6                                            | 22.8                | 26.6                        | 74.2                               | 71.7                    | 9505                        | 2.5                   | 50.5     | 32.0 (3811)     | 1.8 (3828)     | 12.0 (3811)         | 0.6 (3811)                 | 65.9                             | 91.8                       | 30.9                           | 12.3                                     |
| Senegal 2005 DHS      | 7412                            | 12.1                                            | 42.0                | 60.0                        | 63.8                               | 40.5                    | 13684                       | 2.4                   | 51.1     | 17.8 (3165)     | 7.9 (3246)     | 18.7 (3165)         | 1.9 (3165)                 | 11.5                             | 67.0                       | 61.7                           | 22.0                                     |
| Senegal 2010 DHS      | 7904                            | 11.5                                            | 37.5                | 54.7                        | 69.5                               | 44.3                    | 15752                       | 2.5                   | 51.4     | 24.9 (3953)     | 8.6 (4306)     | 24.8 (3953)         | 2.1 (3953)                 | 44.0                             | 73.4                       | 71.1                           | 19.6                                     |
| Senegal 2012 DHS      | 4177                            | 12.8                                            | 39.2                | 66.0                        | 66.9                               | 51.3                    | 8746                        | 2.5                   | 50.0     | 16.6 (6497)     | 9.1 (6636)     | 22.5 (6497)         | 2.2 (6497)                 | 48.6                             | 79.4                       | 68.0                           | 15.5                                     |
| Senegal 2014 DHS      | 4233                            | 11.5                                            | 39.1                | 62.9                        | 69.5                               | 49.1                    | 8432                        | 2.4                   | 50.2     | 17.1 (6714)     | 6.4 (6807)     | 19.6 (6714)         | 1.6 (6714)                 | 49.2                             | 79.9                       | 68.7                           | 20.4                                     |
| Senegal 2015 DHS      | 4511                            | 12.0                                            | 38.9                | 70.3                        | 65.5                               | 49.1                    | 8553                        | 2.4                   | 49.9     | 17.3 (6818)     | 7.6 (6877)     | 21.8 (6818)         | 1.8 (6818)                 | 56.3                             | 79.7                       | 66.5                           | 21.5                                     |
| Senegal 2016 DHS      | 4440                            | 12.5                                            | 39.0                | 69.6                        | 72.0                               | 52.5                    | 8380                        | 2.5                   | 51.2     | 14.7 (6637)     | 7.2 (6714)     | 20.0 (6637)         | 1.6 (6637)                 | 67.4                             | 79.9                       | 66.4                           | 17.2                                     |
| Sierra Leone 2008 DHS | 7284                            | 26.0                                            | 40.6                | 39.9                        | 55.2                               | 46.7                    | 7426                        | 2.4                   | 50.1     | 31.9 (2648)     | 9.4 (2680)     | 24.2 (2648)         | 2.0 (2648)                 | 27.3                             | 51.6                       | 51.4                           | 12.2                                     |
| Sierra Leone 2013 DHS | 12629                           | 24.6                                            | 36.2                | 41.5                        | 58.8                               | 50.0                    | 14958                       | 2.6                   | 49.5     | 32.1 (5104)     | 7.9 (5143)     | 20.4 (5104)         | 2.0 (5104)                 | 49.8                             | 68.5                       | 70.7                           | 12.0                                     |
| Swaziland 2006 DHS    | 4843                            | 44.6                                            | 38.8                | 89.0                        | 71.5                               | 41.2                    | 3713                        | 2.5                   | 49.4     | 23.8 (2784)     | 2.3 (2820)     | 7.3 (2784)          | 0.5 (2784)                 | 0.8                              | 84.8                       | 76.2                           | 15.1                                     |
| Tanzania 2010 DHS     | 9623                            | 14.0                                            | 23.0                | 33.8                        | 52.4                               | 25.5                    | 10107                       | 2.5                   | 49.5     | 34.0 (7605)     | 5.5 (7611)     | 22.1 (7605)         | 1.4 (7605)                 | 61.3                             | 80.7                       | 71.1                           | 14.1                                     |
| Tanzania 2015 DHS     | 12563                           | 18.7                                            | 28.9                | -                           | 63.9                               | 36.7                    | 12745                       | 2.4                   | 49.9     | 27.3 (10222)    | 4.3 (10234)    | 18.2 (10222)        | 1.3 (10222)                | 49.8                             | 76.8                       | 61.6                           | 12.1                                     |
| Togo 2013 DHS         | 9549                            | 36.8                                            | 38.1                | 85.5                        | 63.2                               | 38.3                    | 8583                        | 2.5                   | 50.4     | 23.5 (3531)     | 6.3 (3541)     | 21.3 (3531)         | 1.9 (3531)                 | 43.4                             | 76.2                       | 66.5                           | 16.3                                     |
| Uganda 2006 DHS       | 8870                            | 22.7                                            | 15.7                | 22.6                        | 69.3                               | 27.1                    | 10064                       | 2.5                   | 49.1     | 33.0 (2670)     | 5.4 (2715)     | 21.5 (2670)         | 1.9 (2670)                 | 11.9                             | 22.8                       | 62.7                           | 27.0                                     |
| Uganda 2016 DHS       | 19588                           | 30.8                                            | 22.8                | 33.4                        | 77.0                               | 34.4                    | 19453                       | 2.6                   | 50.4     | 23.5 (5180)     | 3.2 (5266)     | 13.6 (5180)         | 1.0 (5180)                 | 58.5                             | 69.7                       | 59.4                           | 21.0                                     |
| Zambia 2007 DHS       | 7164                            | 37.9                                            | 37.6                | 36.7                        | 42.5                               | 33.0                    | 7404                        | 2.3                   | 49.3     | 38.2 (5639)     | 5.2 (5647)     | 19.2 (5639)         | 1.0 (5639)                 | 32.9                             | 34.0                       | 70.9                           | 16.0                                     |
| Zambia 2013 DHS       | 15920                           | 44.5                                            | 43.7                | 41.9                        | 62.1                               | 41.5                    | 16657                       | 2.5                   | 50.6     | 33.7 (12474)    | 5.5 (12495)    | 19.7 (12474)        | 1.1 (12474)                | 40.0                             | 80.4                       | 74.0                           | 16.5                                     |
| Zimbabwe 2005 DHS     | 9285                            | 48.9                                            | 32.9                | 66.5                        | 77.3                               | 63.4                    | 7284                        | 2.6                   | 50.4     | 29.0 (4979)     | 6.2 (5008)     | 16.4 (4979)         | 1.5 (4979)                 | 3.1                              | 52.7                       | 52.2                           | 13.1                                     |
| Zimbabwe 2010 DHS     | 9756                            | 53.5                                            | 34.1                | 69.8                        | 78.5                               | 63.1                    | 7187                        | 2.4                   | 50.2     | 25.9 (5355)     | 2.9 (5414)     | 13.6 (5355)         | 0.8 (5355)                 | 10.6                             | 65.4                       | 65.1                           | 13.8                                     |
| Zimbabwe 2015 DHS     | 10534                           | 61.7                                            | 41.2                | 76.6                        | 81.6                               | 69.7                    | 8082                        | 2.6                   | 49.6     | 20.4 (6142)     | 3.0 (6142)     | 11.1 (6142)         | 0.4 (6142)                 | 9.2                              | 75.1                       | 61.0                           | 16.9                                     |

ITN: insecticide-treated bednet; DPT: diphtheria-pertussis-tetanus; DRC: Democratic Republic of the Congo.

**Table S2. Association between land surface temperature and growth outcomes in children aged 0-5 years in sub-Saharan Africa (unadjusted analysis)**

| Land surface temperature <sup>a</sup> | Stunting       |                          |         | Wasting        |                          |         | Underweight    |                          |         | Stunting and wasting |                          |         |
|---------------------------------------|----------------|--------------------------|---------|----------------|--------------------------|---------|----------------|--------------------------|---------|----------------------|--------------------------|---------|
|                                       | Prevalence (N) | OR <sup>b</sup> (95% CI) | p       | Prevalence (N) | OR <sup>b</sup> (95% CI) | p       | Prevalence (N) | OR <sup>b</sup> (95% CI) | p       | Prevalence (N)       | OR <sup>b</sup> (95% CI) | p       |
| <b>All children</b>                   |                |                          |         |                |                          |         |                |                          |         |                      |                          |         |
| <30°C                                 | 32.5 (156,782) | 1                        |         | 5.6 (155,552)  | 1                        |         | 20.3 (153,619) | 1                        |         | 1.5 (153,619)        | 1                        |         |
| 30°C to 34°C                          | 32.1 (178,317) | 1.03 (1.01, 1.06)        | <0.0001 | 7.3 (179,847)  | 1.27 (1.22, 1.32)        | <0.0001 | 22.4 (176,497) | 1.17 (1.14, 1.20)        | <0.0001 | 2.0 (176,497)        | 1.39 (1.30, 1.48)        | <0.0001 |
| ≥35°C                                 | 31.2 (101,374) | 1.17 (1.13, 1.21)        |         | 12.7 (102,773) | 1.95 (1.85, 2.05)        |         | 31.2 (100,988) | 1.64 (1.57, 1.70)        |         | 3.9 (100,988)        | 2.08 (1.92, 2.25)        |         |
| <b>Children aged &lt;2 years</b>      |                |                          |         |                |                          |         |                |                          |         |                      |                          |         |
| <30°C                                 | 26.5 (61,283)  | 1                        |         | 7.9 (60,427)   | 1                        |         | 19.0 (60,142)  | 1                        |         | 1.8 (60,142)         | 1                        |         |
| 30°C to 34°C                          | 27.4 (70,914)  | 1.07 (1.04, 1.11)        | <0.0001 | 10.1 (70,755)  | 1.22 (1.17, 1.28)        | <0.0001 | 21.6 (70,229)  | 1.22 (1.17, 1.26)        | <0.0001 | 2.5 (70,229)         | 1.37 (1.26, 1.50)        | <0.0001 |
| ≥35°C                                 | 24.8 (39,853)  | 1.17 (1.12, 1.23)        |         | 15.6 (39,895)  | 1.64 (1.54, 1.74)        |         | 27.8 (39,698)  | 1.55 (1.48, 1.63)        |         | 4.2 (39,698)         | 1.84 (1.65, 2.04)        |         |
| <b>Children aged 2-5 years</b>        |                |                          |         |                |                          |         |                |                          |         |                      |                          |         |
| <30°C                                 | 36.3 (95,499)  | 1                        |         | 4.1 (95,125)   | 1                        |         | 21.2 (93,477)  | 1                        |         | 1.2 (93,477)         | 1                        |         |
| 30°C to 34°C                          | 35.2 (107,403) | 1.01 (0.98, 1.04)        | <0.0001 | 5.6 (109,092)  | 1.32 (1.24, 1.40)        | <0.0001 | 22.9 (106,268) | 1.14 (1.10, 1.18)        | <0.0001 | 1.7 (106,268)        | 1.39 (1.27, 1.52)        | <0.0001 |
| ≥35°C                                 | 35.3 (61,521)  | 1.17 (1.12, 1.22)        |         | 10.7 (62,878)  | 2.35 (2.18, 2.54)        |         | 33.3 (61,290)  | 1.68 (1.61, 1.76)        |         | 3.7 (61,290)         | 2.31 (2.08, 2.57)        |         |

<sup>a</sup> Monthly mean daytime land surface temperature, calculated from synoptic monthly means from 2000 to 2016

<sup>b</sup> Adjusted for survey

OR: Odds Ratio; CI: confidence interval

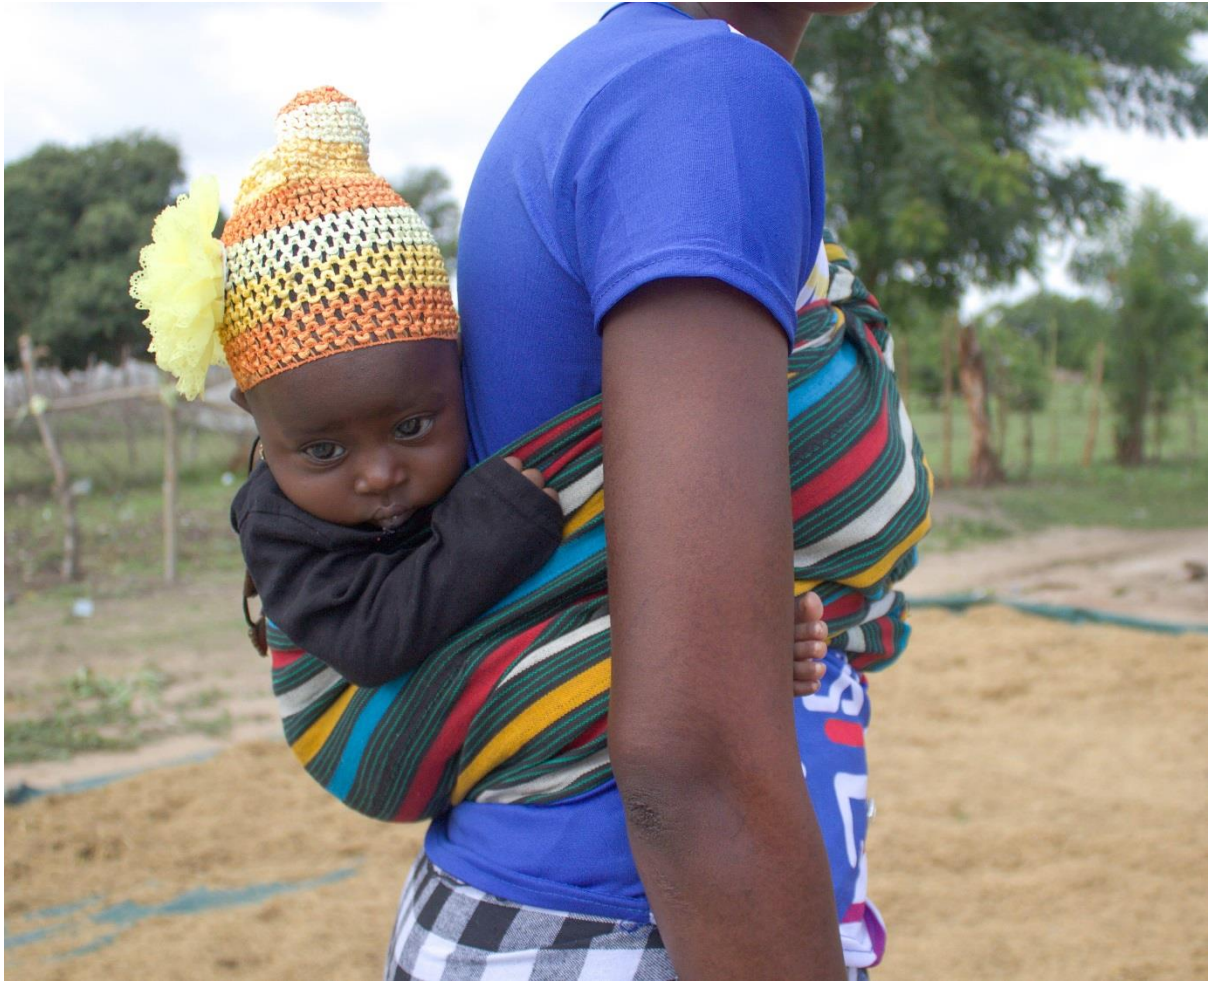

**Figure S1.** Child carried on her mother's back in The Gambia. Back-carrying of young children is common across sub-Saharan Africa. Photograph: Maria J. Carrasco-Tenezaca.
